# Supplementary material for: Cardiac magnetic resonance imaging in pulmonary arterial hypertension
Source: PubMed Central journal article supplement — Eur Respir Rev. 2013 Dec;22(130):526–34. doi: 10.1183/09059180.00006313 (PMC9639186; doi:10.1183/09059180.00006313), 2013-12
Supplement: ERR_0063-2013_Disclosures.pdf [file ERR_0063-2013_Disclosures.pdf]

**A.J. Peacock** has received honoraria for speaking at meetings (non-promotional) from Actelion Pharmaceuticals Ltd, Bayer, Eli Lilly, GlaxoSmithKline, Novartis, Pfizer and United Therapeutics, has received travel assistance provided by Actelion Pharmaceuticals Ltd, Bayer, Eli Lilly, GlaxoSmithKline, Novartis, Pfizer and United Therapeutics and participated in advisory boards for Actelion Pharmaceuticals Ltd, Bayer, Eli Lilly, GlaxoSmithKline, Novartis and Pfizer.

**A. Vonk Noordegraaf** has received lecture fees from Actelion Pharmaceuticals Ltd, Bayer, GlaxoSmithKline, Lilly, United Therapeutics and Pfizer, has participated in advisory boards for Actelion Pharmaceuticals Ltd, United Therapeutics, Novartis and Bayer and served on steering committees for Actelion Pharmaceuticals Ltd, GlaxoSmithKline, Bayer and Pfizer.
